# Supplementary material
Source: Springer Nature journal article supplement (https://www.springermedizin.de/resource/supplementary/12883_2010_395_MOESM4_ESM.pdf/9455054)

A) 1.5 hours post-sonication

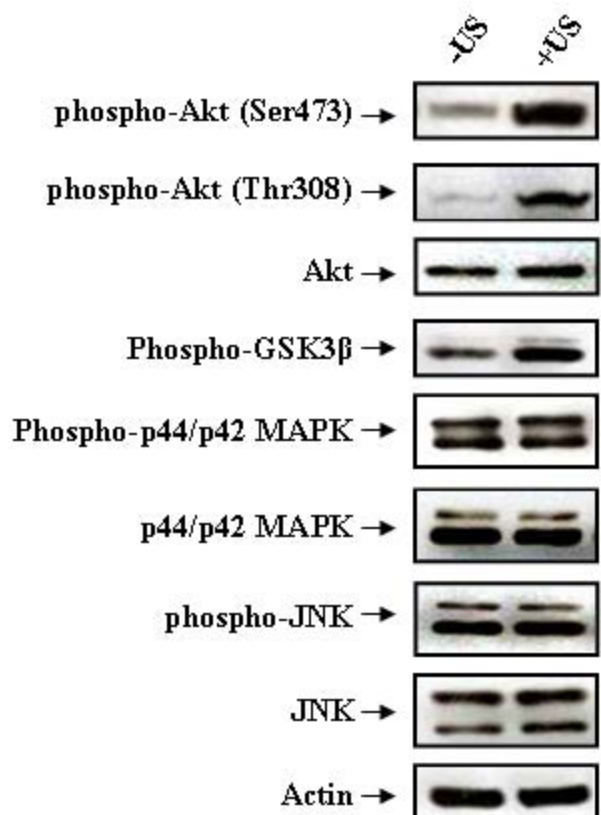

B) 24 hours post-sonication

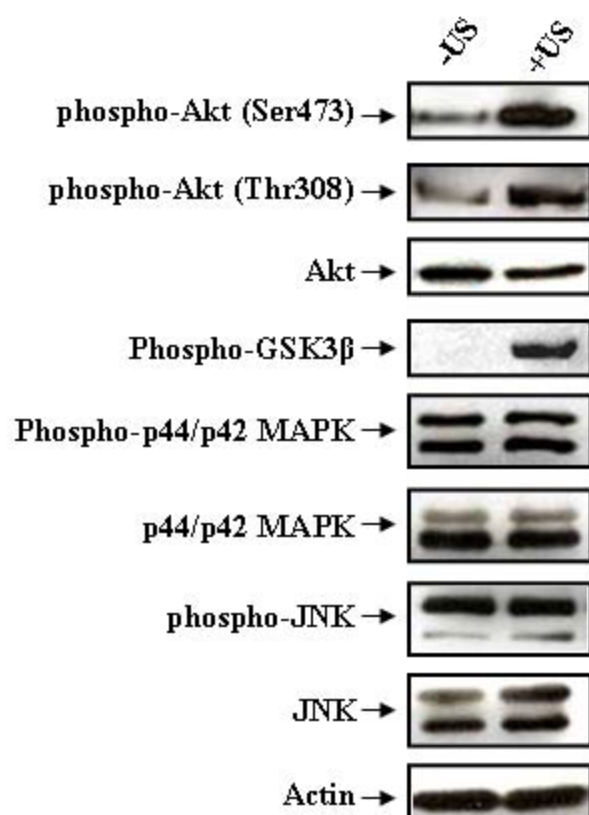

C)

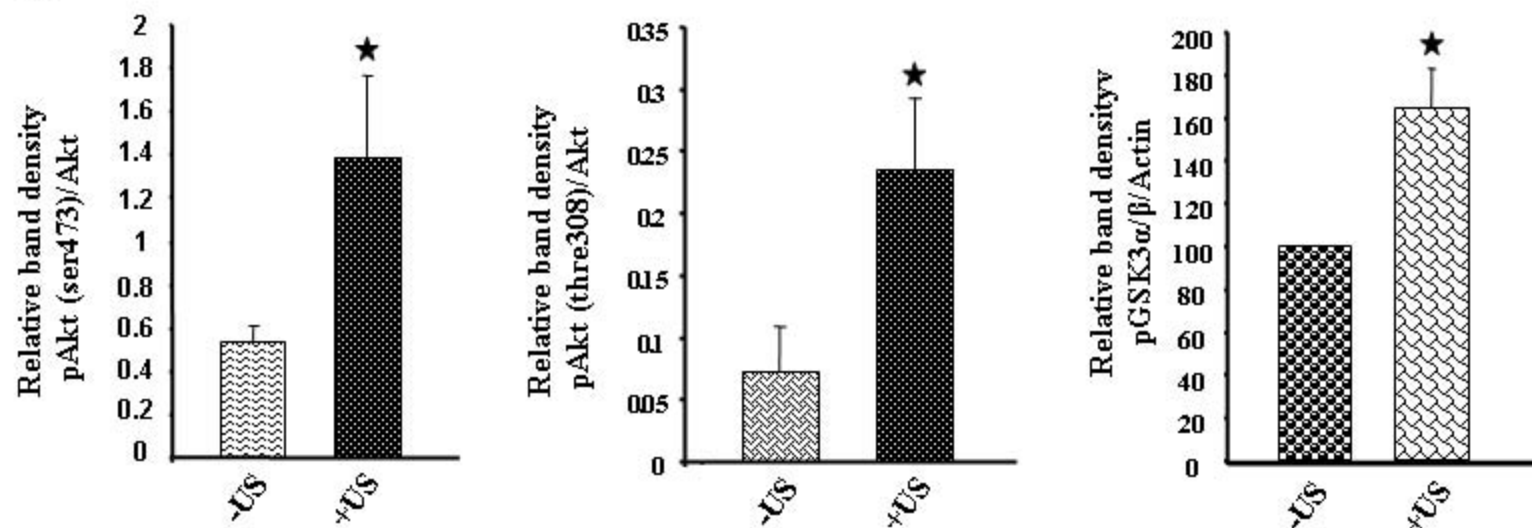

Supplement: MOESM4 [file 9455054]
